# Supplementary material for: The effects of a CBT-I based app-program on sleep quality, insomnia severity, psychological strain and quality of life: A first efficacy study
Source: Research Square preprint supplement (doi:10.21203/rs.3.rs-3218498/v1), 2023-08-07
Supplement: Supplementary file 1 [file 80d15aef820c319779cde919.docx]

**SUPPLEMENTARY INFORMATION**

**The effects of a CBT-I based app-program on sleep quality, insomnia severity, psychological strain and quality of life: A first efficacy study**

Esther-Sevil Eigl1, Alexandra Hinterberger1, Pavlos Topalidis1 & Manuel Schabus1,2

1 Laboratory for Sleep, Cognition & Consciousness Research, Department of Psychology, Paris-Lodron University of Salzburg, Austria

2 Centre for Cognitive Neuroscience Salzburg (CCNS), Paris-Lodron University of Salzburg, Austria

**Corresponding author**

Manuel Schabus
University of Salzburg, Centre for Cognitive Neuroscience, Laboratory for Sleep, Cognition and Consciousness Research
Hellbrunnerstrasse 34

5020 Salzburg, Austria
Email: Manuel.Schabus@plus.ac.at

**Table S1.** Mean (M), median (Mdn) and standard deviation (SD) for the changes in Pittsburgh Sleep Quality Index (PSQI) from baseline to follow-up (T0-T3), pre-training to follow-up (T1-T3) and post-training to follow-up (T2-T3) for every group of usage frequency until the follow-up (T3).

| PSQI | | | | | | | | | | | | | |
| --- | --- | --- | --- | --- | --- | --- | --- | --- | --- | --- | --- | --- | --- |
|  | No usage (*n*=17) | | | Rare usage (*n*=11) | | | Frequent usage (*n*=5) | | | Regular usage (*n*=15) | | | |
| Time | *M* | *Mdn* | *SD* | *M* | *Mdn* | *SD* | *M* | *Mdn* | *SD* | *M* | *Mdn* | *SD* |
| T0-T3 | 2.29 | 3.00 | 3.08 | 3.27 | 3.00 | 3.13 | 1.20 | 1.00 | 2.39 | 3.27 | 4.00 | 2.69 |
| T1-T3 | 1.76 | 2.00 | 2.84 | 2.63 | 2.00 | 3.56 | -0.20 | 0.00 | 1.64 | 2.80 | 2.00 | 2.48 |
| T2-T3 | 0.12 | 0.00 | 1.76 | 1.18 | 2.00 | 2.14 | -0.20 | 0.00 | 2.39 | 0.73 | 1.00 | 1.33 |

**Table S2.** Mean (M), median (Mdn) and standard deviation (SD) for the changes in Insomnia Severity Index (ISI) from baseline to follow-up (T0-T3), pre-training to follow-up (T1-T3) and post-training to follow-up (T2-T3) for every group of usage frequency until the follow-up (T3).

| ISI | | | | | | | | | | | | | |
| --- | --- | --- | --- | --- | --- | --- | --- | --- | --- | --- | --- | --- | --- |
|  | No usage (*n*=17) | | | Rare usage (*n*=11) | | | Frequent usage (*n*=5) | | | Regular usage (*n*=15) | | | |
| Time | *M* | *Mdn* | *SD* | *M* | *Mdn* | *SD* | *M* | *Mdn* | *SD* | *M* | *Mdn* | *SD* |
| T0-T3 | 3.71 | 3.00 | 5.13 | 4.55 | 4.00 | 4.41 | 3.80 | 5.00 | 4.81 | 5.00 | 3.00 | 4.78 |
| T1-T3 | 4.24 | 4.00 | 5.54 | 3.82 | 2.00 | 5.29 | 2.00 | 3.00 | 3.08 | 4.40 | 3.00 | 3.14 |
| T2-T3 | -0.06 | -1.00 | 3.68 | 0.91 | 2.00 | 4.25 | -1.00 | -1.00 | 3.00 | 2.20 | 2.00 | 2.48 |

**Table S3.** Mean (M), median (Mdn) and standard deviation (SD) for the changes in Brief Symptom Inventory – global score (BSI - GSI) from baseline to follow-up (T0-T3), pre-training to follow-up (T1-T3) and post-training to follow-up (T2-T3) for every group of usage frequency until the follow-up (T3).

| BSI - GSI | | | | | | | | | | | | | |
| --- | --- | --- | --- | --- | --- | --- | --- | --- | --- | --- | --- | --- | --- |
|  | No usage (*n*=17) | | | Rare usage (*n*=11) | | | Frequent usage (*n*=5) | | | Regular usage (*n*=15) | | | |
| Time | *M* | *Mdn* | *SD* | *M* | *Mdn* | *SD* | *M* | *Mdn* | *SD* | *M* | *Mdn* | *SD* |
| T0-T3 | 0.20 | 0.09 | 0.27 | 0.15 | 0.13 | 0.37 | 0.19 | 0.00 | 0.46 | 0.13 | 0.08 | 0.32 |
| T1-T3 | 0.26 | 0.15 | 0.32 | 0.15 | 0.09 | 0.29 | 0.20 | -0.02 | 0.38 | 0.13 | 0.17 | 0.18 |
| T2-T3 | 0.03 | 0.00 | 0.13 | -0.04 | -0.04 | 0.27 | 0.07 | -0.04 | 0.20 | 0.03 | 0.02 | 0.12 |

**Table S4.** Mean (M), median (Mdn) and standard deviation (SD) for the changes in Brief Symptom Inventory – subscale depression (BSI - D) from baseline to follow-up (T0-T3), pre-training to follow-up (T1-T3) and post-training to follow-up (T2-T3) for every group of usage frequency until the follow-up (T3).

| BSI - D | | | | | | | | | | | | | |
| --- | --- | --- | --- | --- | --- | --- | --- | --- | --- | --- | --- | --- | --- |
|  | No usage (*n*=17) | | | Rare usage (*n*=11) | | | Frequent usage (*n*=5) | | | Regular usage (*n*=15) | | | |
| Time | *M* | *Mdn* | *SD* | *M* | *Mdn* | *SD* | *M* | *Mdn* | *SD* | *M* | *Mdn* | *SD* |
| T0-T3 | 0.25 | 0.17 | 0.33 | 0.26 | 0.17 | 0.72 | 0.30 | 0.00 | 0.41 | 0.09 | 0.00 | 0.43 |
| T1-T3 | 0.32 | 0.17 | 0.60 | 0.04 | -0.17 | 0.45 | 0.30 | 0.33 | 0.22 | 0.13 | 0.00 | 0.33 |
| T2-T3 | 0.05 | 0.00 | 0.14 | -0.08 | 0.00 | 0.37 | 0.17 | 0.16 | 0.20 | 0.01 | 0.00 | 0.16 |

**Table S5.** Mean (M), median (Mdn) and standard deviation (SD) for the changes in Brief Symptom Inventory – subscale anxiety (BSI - A) from baseline to follow-up (T0-T3), pre-training to follow-up (T1-T3) and post-training to follow-up (T2-T3) for every group of usage frequency until the follow-up (T3).

| BSI - A | | | | | | | | | | | | | |
| --- | --- | --- | --- | --- | --- | --- | --- | --- | --- | --- | --- | --- | --- |
|  | No usage (*n*=17) | | | Rare usage (*n*=11) | | | Frequent usage (*n*=5) | | | Regular usage (*n*=15) | | | |
| Time | *M* | *Mdn* | *SD* | *M* | *Mdn* | *SD* | *M* | *Mdn* | *SD* | *M* | *Mdn* | *SD* |
| T0-T3 | 0.26 | 0.17 | 0.31 | 0.26 | 0.17 | 0.49 | 0.13 | 0.00 | 0.46 | 0.22 | 0.00 | 0.49 |
| T1-T3 | 0.31 | 0.33 | 0.35 | 0.27 | 0.17 | 0.43 | 0.17 | 0.17 | 0.26 | 0.18 | 0.17 | 0.22 |
| T2-T3 | 0.02 | 0.00 | 0.24 | -0.03 | 0.00 | 0.35 | 0.03 | 0.00 | 0.25 | 0.09 | 0.00 | 0.27 |

**Table S6.** Mean (M), median (Mdn) and standard deviation (SD) for the changes in WHO Quality of life (WHOQOL-BREF) – domain physical health, from baseline to follow-up (T0-T3), pre-training to follow-up (T1-T3) and post-training to follow-up (T2-T3) for every group of usage frequency until the follow-up (T3).

| WHOQOL-Bref (physical health) | | | | | | | | | | | | | |
| --- | --- | --- | --- | --- | --- | --- | --- | --- | --- | --- | --- | --- | --- |
|  | No usage (*n*=17) | | | Rare usage (*n*=11) | | | Frequent usage (*n*=5) | | | Regular usage (*n*=15) | | | |
| Time | *M* | *Mdn* | *SD* | *M* | *Mdn* | *SD* | *M* | *Mdn* | *SD* | *M* | *Mdn* | *SD* |
| T0-T3 | 7.00 | 6.00 | 8.79 | 5.18 | 7.00 | 10.22 | 8.80 | 6.00 | 9.63 | 4.47 | 6.00 | 10.66 |
| T1-T3 | 7.00 | 6.00 | 10.18 | 4.45 | 6.00 | 10.76 | 4.60 | 6.00 | 8.17 | 4.60 | 6.00 | 12.63 |
| T2-T3 | 2.88 | 0.00 | 8.81 | 4.63 | 6.00 | 10.71 | 6.20 | 6.00 | 4.60 | 3.67 | 6.00 | 7.54 |

**Table S7.** Mean (M), median (Mdn) and standard deviation (SD) for the changes in WHO Quality of life (WHOQOL-BREF) – domain psychological health, from baseline to follow-up (T0-T3), pre-training to follow-up (T1-T3) and post-training to follow-up (T2-T3) for every group of usage frequency until the follow-up (T3).

| WHOQOL-Bref (psychological health) | | | | | | | | | | | | | |
| --- | --- | --- | --- | --- | --- | --- | --- | --- | --- | --- | --- | --- | --- |
|  | No usage (*n*=17) | | | Rare usage (*n*=11) | | | Frequent usage (*n*=5) | | | Regular usage (*n*=15) | | | |
| Time | *M* | *Mdn* | *SD* | *M* | *Mdn* | *SD* | *M* | *Mdn* | *SD* | *M* | *Mdn* | *SD* |
| T0-T3 | 4.35 | 6.00 | 7.91 | 6.09 | 6.00 | 15.90 | 8.80 | 7.00 | 10.83 | 4.20 | 6.00 | 7.54 |
| T1-T3 | 5.53 | 0.00 | 14.24 | 5.55 | 6.00 | 11.54 | 6.40 | 7.00 | 6.27 | 3.33 | 0.00 | 12.06 |
| T2-T3 | 1.82 | 0.00 | 7.62 | 2.73 | 6.00 | 10.86 | 10.20 | 12.00 | 3.42 | 2.00 | 0.00 | 6.56 |
